# Supplementary material for: Graphene supported single metal atom catalysts for the efficient hydrogen oxidation reaction in alkaline media
Source: Royal Society of Chemistry journal article supplement (doi:10.1039/d1cy01959g), 2021-11-30
Supplement: d1cy01959g1.pdf [file d1cy01959g1.pdf]

**Graphene Supported Single Metal Atom Catalysts for Efficient Hydrogen  
Oxidation Reaction in Alkaline Media**

Lianming Zhao\*, Xiaonan Han, Weichao Kong, Yanfu Tong, Yanping Ding, Jiajun  
Wang, Bingyu Li, Yonghui Liu, Jing Xu\*, Wei Xing

School of Materials Science and Engineering, China University of Petroleum (East  
China), Qingdao, Shandong 266580, PR China

\*Corresponding authors.

E-mail addresses: lmzhao@upc.edu.cn (L. Zhao), xujing@upc.edu.cn (J. Xu).

## Table of contents

|                                                                                                               |      |
|---------------------------------------------------------------------------------------------------------------|------|
| 1. Binding energy, M- <i>ortho</i> -C distance, and height of metal atoms over the graphene surface           | for  |
| M/G.....                                                                                                      | S-3  |
| 2. Bond lengths and bond angle for the adsorption on M/G.....                                                 | S-4  |
| 3. Adsorption energy of H* on M/G with and without OH*.....                                                   | S-5  |
| 4. Adsorption energy of H <sub>2</sub> * on M/G with and without OH*.....                                     | S-6  |
| 5. Adsorption energy of H <sub>2</sub> O* on M/G with and without OH*.....                                    | S-7  |
| 6. Rate constants for the reactions involved in the HOR on M/G at 298 K.....                                  | S-8  |
| 7. Rate constants for the reactions involved in the HOR on M/G at 340 K.....                                  | S-9  |
| 8. Side and top views of the configurations for M/G with K <sup>+</sup> OH <sup>-</sup> solution.....         | S-10 |
| 9. Population of Hirshfeld charges in M/G.....                                                                | S-11 |
| 10. Density of states of the M/G catalysts.....                                                               | S-12 |
| 11. Adsorption configurations of OH*, H*, H <sub>2</sub> *, and H <sub>2</sub> O* on M/G.....                 | S-13 |
| 12. Optimized structures of DG, DG-4H, and DG-8H.....                                                         | S-14 |
| 13. Co-adsorption configurations of OH* with H*, H <sub>2</sub> *, and H <sub>2</sub> O* on M/G.....          | S-15 |
| 14. Phase diagram showing the free energy for different surface structures for water in contact with M/G..... | S-16 |

**Table S1** Calculated binding energy of M with the divacancy graphene ( $E_b$ ), distance of M-*ortho*-C ( $d(\text{M-ortho-C})$ ), and height ( $h(\text{M})$ ) of M over the graphene surface for M/G.

| Catalysts | $E_b$ (eV)    | $d(\text{M-ortho-C})$ (Å) | $h(\text{M})$ (Å) |
|-----------|---------------|---------------------------|-------------------|
| Cr/G      | -4.03 (-4.18) | 1.974                     | 0.757             |
| Mn/G      | -4.27 (-4.41) | 1.957                     | 0.693             |
| Fe/G      | -5.22 (-5.40) | 1.939                     | 0.628             |
| Co/G      | -5.64 (-5.77) | 1.892                     | 0.491             |
| Ni/G      | -6.28 (-6.43) | 1.891                     | 0.017             |
| Pt/G      | -7.10 (-7.16) | 1.981                     | 0.763             |

Note: (i) Values in the parentheses are the results calculated by the HSE06 functional. (ii) The binding energy ( $E_b$ ) of M with the divacancy graphene (DG) for M/G was calculated by the equation:

$$E_b = E_{\text{M/G}} - (E_{\text{M}} + E_{\text{DG}})$$

where  $E_{\text{M/G}}$ ,  $E_{\text{M}}$ , and  $E_{\text{DG}}$  are the total energy of M/G, the metal atom M, and the graphene with a divacancy defect, respectively.

**Table S2** Calculated adsorption energy ( $E_{\text{ads}}$ ) of  $\text{H}^*$  on M/G with and without  $\text{OH}^*$ .

| Catalysts | $E_{\text{ads}}(\text{H}^*)$ (eV) | $E_{\text{ads}}(\text{H}^*+\text{OH}^*)$ (eV) |
|-----------|-----------------------------------|-----------------------------------------------|
| Cr/G      | -3.08                             | -2.88                                         |
| Mn/G      | -2.94                             | -2.87                                         |
| Fe/G      | -2.98                             | -2.91                                         |
| Co/G      | -3.01                             | -2.86                                         |
| Ni/G      | -2.97                             | -2.80                                         |
| Pt/G      | -2.90                             | -2.68                                         |

**Table S3** Calculated adsorption energy ( $E_{\text{ads}}$ ) of  $\text{H}_2^*$  on M/G with and without  $\text{OH}^*$ .

| Catalysts | $E_{\text{ads}}(\text{H}_2^*)$ (eV) | $E_{\text{ads}}(\text{H}_2^*+\text{OH}^*)$ (eV) |
|-----------|-------------------------------------|-------------------------------------------------|
| Cr/G      | -0.16                               | -0.83                                           |
| Mn/G      | -0.16                               | -0.82                                           |
| Fe/G      | -0.15                               | -0.30                                           |
| Co/G      | -0.15                               | -0.31                                           |
| Ni/G      | -0.16                               | -0.20                                           |
| Pt/G      | -0.19                               | -0.27                                           |

**Table S4** Calculated adsorption energy ( $E_{\text{ads}}$ ) of  $\text{H}_2\text{O}^*$  on M/G with and without  $\text{OH}^*$ .

| Catalysts | $E_{\text{ads}}(\text{H}_2\text{O}^*)$ (eV) | $E_{\text{ads}}(\text{H}_2\text{O}^*+\text{OH}^*)$ (eV) |
|-----------|---------------------------------------------|---------------------------------------------------------|
| Cr/G      | -0.43                                       | -0.62                                                   |
| Mn/G      | -0.41                                       | -0.62                                                   |
| Fe/G      | -0.39                                       | -0.62                                                   |
| Co/G      | -0.38                                       | -0.62                                                   |
| Ni/G      | -0.36                                       | -0.58                                                   |
| Pt/G      | -0.36                                       | -0.63                                                   |

**Table S5** Calculated bond lengths ( $d$ ) and bond angle ( $\theta$ ) for the adsorption on M/G.

| Species           | Parameters                | Cr/G  | Mn/G  | Fe/G  | Co/G  | Ni/G  | Pt/G  |
|-------------------|---------------------------|-------|-------|-------|-------|-------|-------|
| OH*               | $d(\text{M-OH})$          | 1.759 | 1.747 | 1.751 | 1.778 | 1.842 | 2.042 |
| H <sub>2</sub> *  | $d(\text{M-H}_2)$         | 3.196 | 3.118 | 3.041 | 2.848 | 2.572 | 2.569 |
| H <sub>2</sub> O* | $d(\text{M-H}_2\text{O})$ | 3.087 | 3.041 | 2.861 | 2.980 | 2.764 | 2.518 |
| H*                | $d(\text{ortho-C-H})$     | 1.131 | 1.126 | 1.120 | 1.129 | 1.129 | 1.100 |
| H*                | $\theta(\text{H-C-C})$    | 113.8 | 114.4 | 114.8 | 114.3 | 116.7 | 115.5 |

**Table S6** Rate constants ( $k$ ) for the elementary reactions involved in the HOR on M/G at 298 K.

| Catalysts | Tafel<br>(s <sup>-1</sup> ) | Heyrovsky<br>(s <sup>-1</sup> ) | H <sub>2</sub> *+OH*<br>(s <sup>-1</sup> ) | Volmer<br>(s <sup>-1</sup> ) | H*+OH*<br>(s <sup>-1</sup> ) |
|-----------|-----------------------------|---------------------------------|--------------------------------------------|------------------------------|------------------------------|
| Cr/G      | 5.14×10 <sup>5</sup>        | 5.72×10 <sup>5</sup>            | 4.88×10 <sup>-7</sup>                      | 3.87×10 <sup>11</sup>        | 3.87×10 <sup>-4</sup>        |
| Mn/G      | 4.31×10 <sup>6</sup>        | 9.81×10 <sup>7</sup>            | 4.93×10 <sup>-7</sup>                      | 8.32×10 <sup>9</sup>         | 3.17×10 <sup>2</sup>         |
| Fe/G      | 2.48×10 <sup>4</sup>        | 6.98×10 <sup>5</sup>            | 6.37×10 <sup>-8</sup>                      | 1.89×10 <sup>7</sup>         | 4.23×10 <sup>2</sup>         |
| Co/G      | 6.38×10 <sup>3</sup>        | 5.76×10 <sup>6</sup>            | 1.37×10 <sup>-11</sup>                     | 6.53×10 <sup>10</sup>        | 2.17×10 <sup>2</sup>         |
| Ni/G      | 3.17×10 <sup>2</sup>        | 8.72×10 <sup>7</sup>            | 1.36×10 <sup>-9</sup>                      | 3.22×10 <sup>9</sup>         | 2.13×10 <sup>1</sup>         |
| Pt/G      | 6.51×10 <sup>6</sup>        | 2.37×10 <sup>8</sup>            | 1.41×10 <sup>-2</sup>                      | 5.87×10 <sup>13</sup>        | 3.47×10 <sup>3</sup>         |



**Table S7** Rate constants  $k$  for the elementary reactions involved in the HOR on M/G at 340 K.

| Catalysts | Tafel<br>(s <sup>-1</sup> ) | Heyrovsky<br>(s <sup>-1</sup> ) | H <sub>2</sub> *+OH*<br>(s <sup>-1</sup> ) | Volmer<br>(s <sup>-1</sup> ) | H*+OH*<br>(s <sup>-1</sup> ) |
|-----------|-----------------------------|---------------------------------|--------------------------------------------|------------------------------|------------------------------|
| Cr/G      | 1.97×10 <sup>6</sup>        | 6.48×10 <sup>6</sup>            | 1.78×10 <sup>-5</sup>                      | 1.18×10 <sup>12</sup>        | 6.23×10 <sup>-6</sup>        |
| Mn/G      | 3.41×10 <sup>6</sup>        | 9.14×10 <sup>8</sup>            | 5.27×10 <sup>-6</sup>                      | 7.22×10 <sup>8</sup>         | 5.31×10 <sup>1</sup>         |
| Fe/G      | 2.89×10 <sup>5</sup>        | 8.06×10 <sup>6</sup>            | 6.33×10 <sup>-10</sup>                     | 3.19×10 <sup>8</sup>         | 7.63×10 <sup>2</sup>         |
| Co/G      | 4.11×10 <sup>5</sup>        | 1.33×10 <sup>7</sup>            | 2.93×10 <sup>-9</sup>                      | 4.13×10 <sup>10</sup>        | 1.71×10 <sup>3</sup>         |
| Ni/G      | 3.17×10 <sup>4</sup>        | 4.73×10 <sup>8</sup>            | 4.55×10 <sup>-9</sup>                      | 1.10×10 <sup>9</sup>         | 2.14×10 <sup>3</sup>         |
| Pt/G      | 9.58×10 <sup>7</sup>        | 1.01×10 <sup>10</sup>           | 3.01×10 <sup>0</sup>                       | 8.87×10 <sup>12</sup>        | 1.58×10 <sup>5</sup>         |

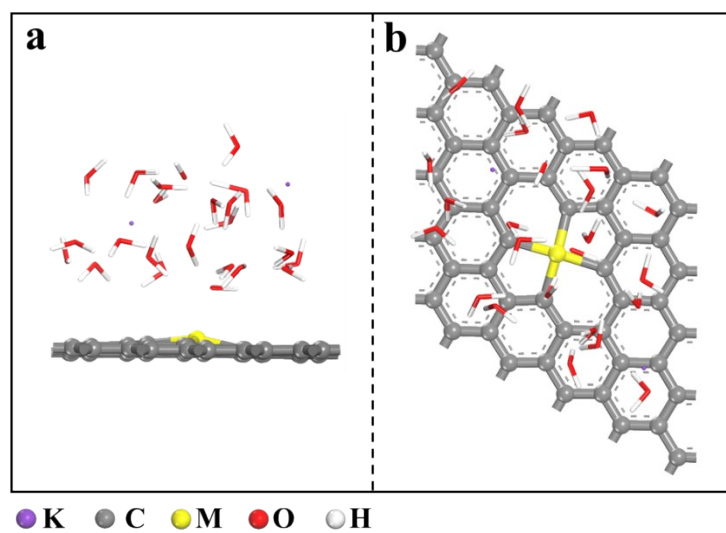

**Fig. S1** (a) Side and (b) top views of the configurations for the M/G catalysts with the  $K^+OH^-$  solution.

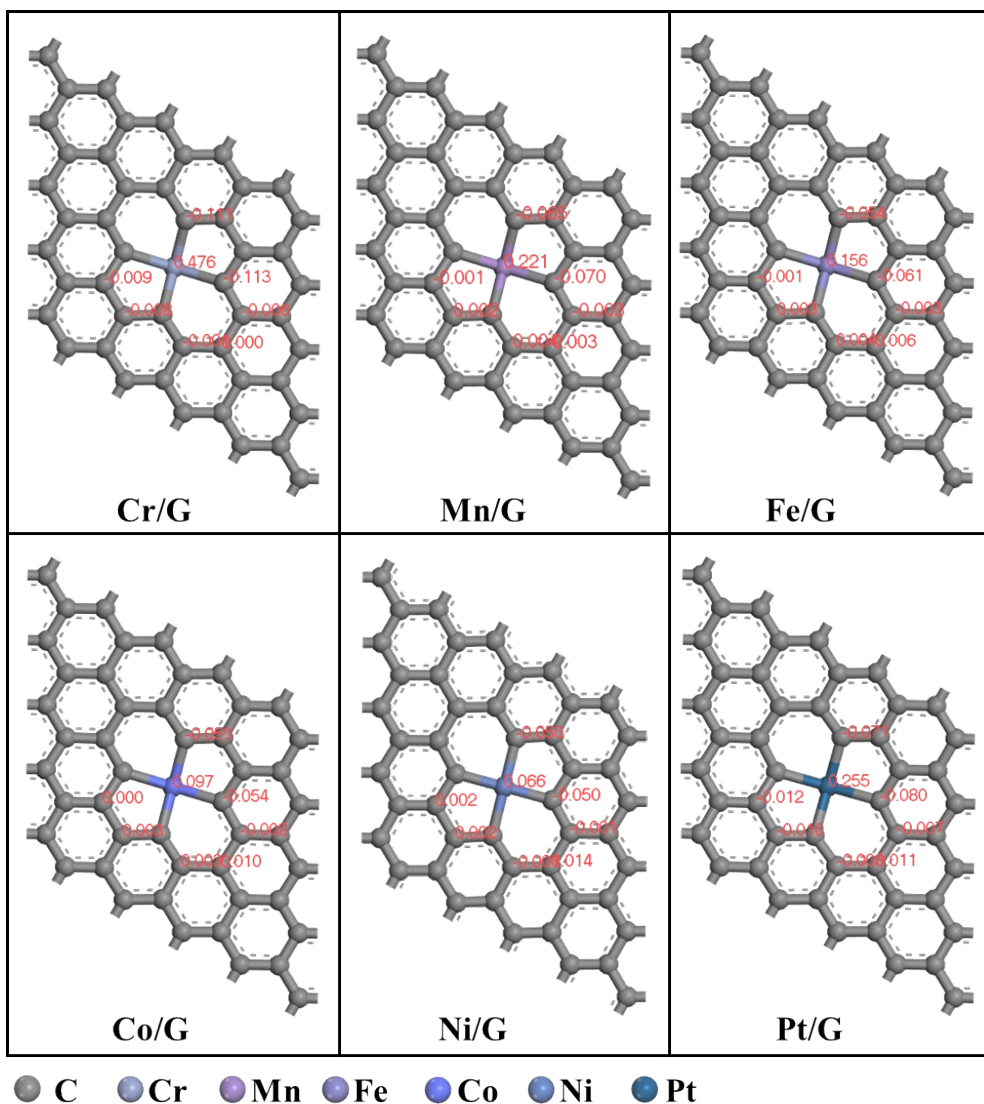

Fig. S2 Population of Hirshfeld charges (in e) in the M/G catalysts.

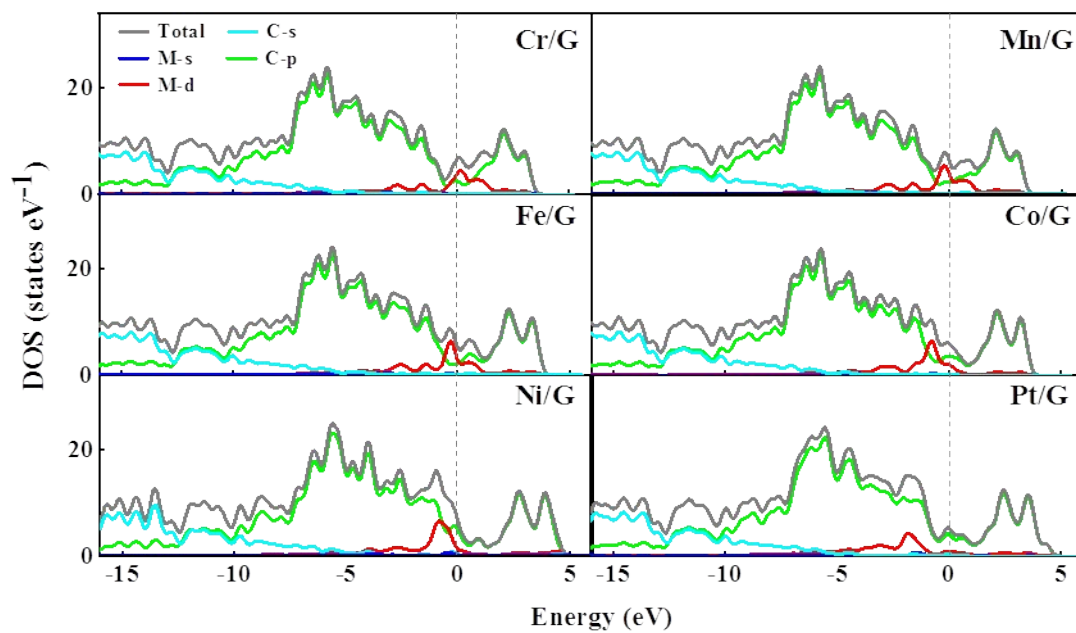

**Fig. S3** Partial density of states (PDOS) of the M/G catalysts.

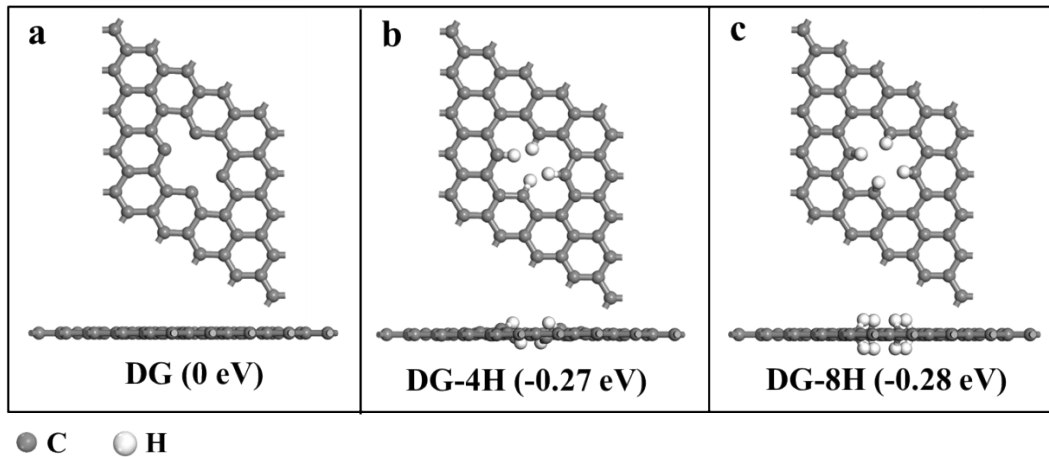

**Fig. S4** Optimized structures of DG-nH: (a) DG, (b) DG-4H, and (c) DG-8H. Values in the parentheses are the energies calculated by the following equation:  $E_{\text{rel}} = E_{\text{DG-nH}}$

$-E_{\text{DG}} - \frac{n}{2}\mu_{\text{H}_2}$ , where  $E_{\text{DG-nH}}$  and  $E_{\text{DG}}$  are the total energy of DG-nH and DG, respectively.  $\mu_{\text{H}_2}$  is the chemical potential of the  $\text{H}_2$  molecule.

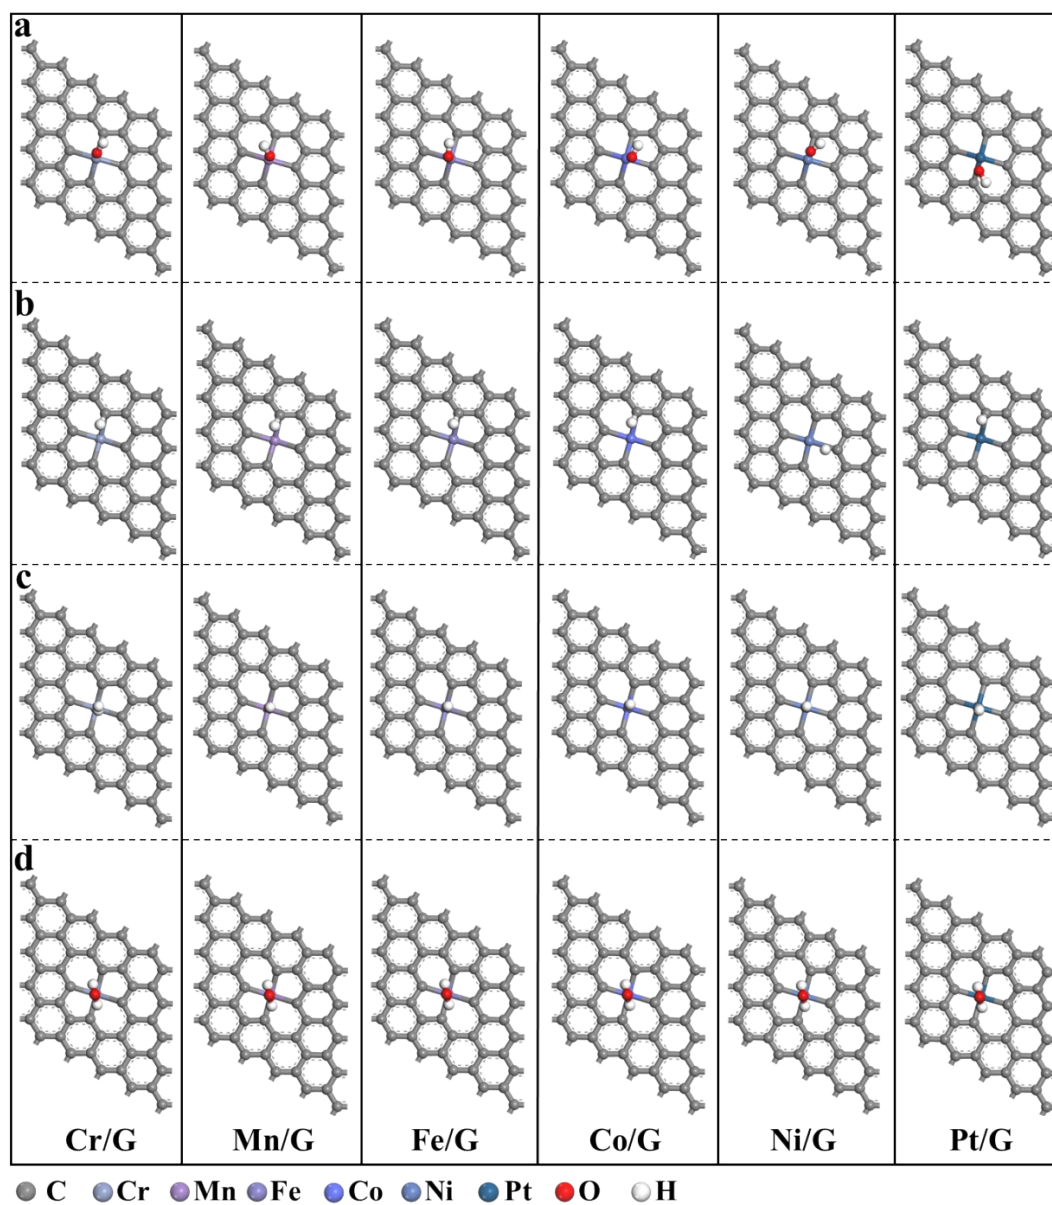

**Fig. S5** Adsorption configurations of (a) OH\*, (b) H\*, (c) H<sub>2</sub>\*, and (d) H<sub>2</sub>O\* on the M/G catalysts.

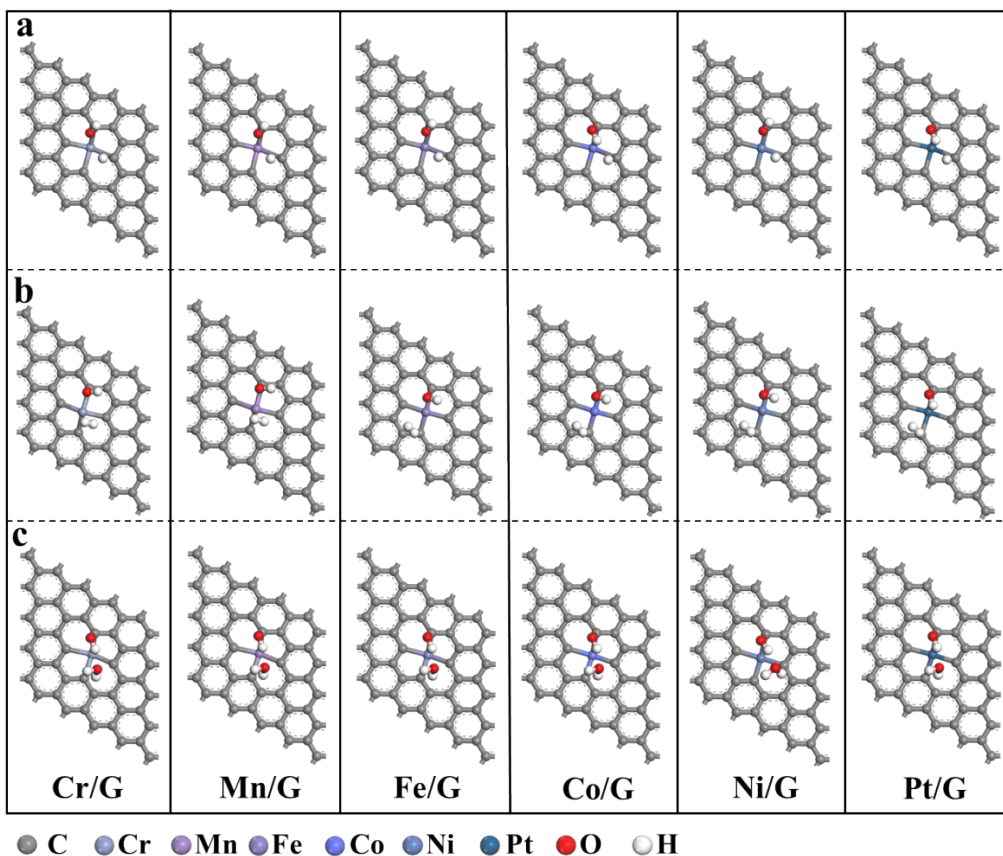

**Fig. S6** Co-adsorption configurations of (a)  $\text{H}^* + \text{OH}^*$ , (b)  $\text{H}_2^* + \text{OH}^*$ , and (c)  $\text{H}_2\text{O}^* + \text{OH}^*$  on the M/G catalysts.

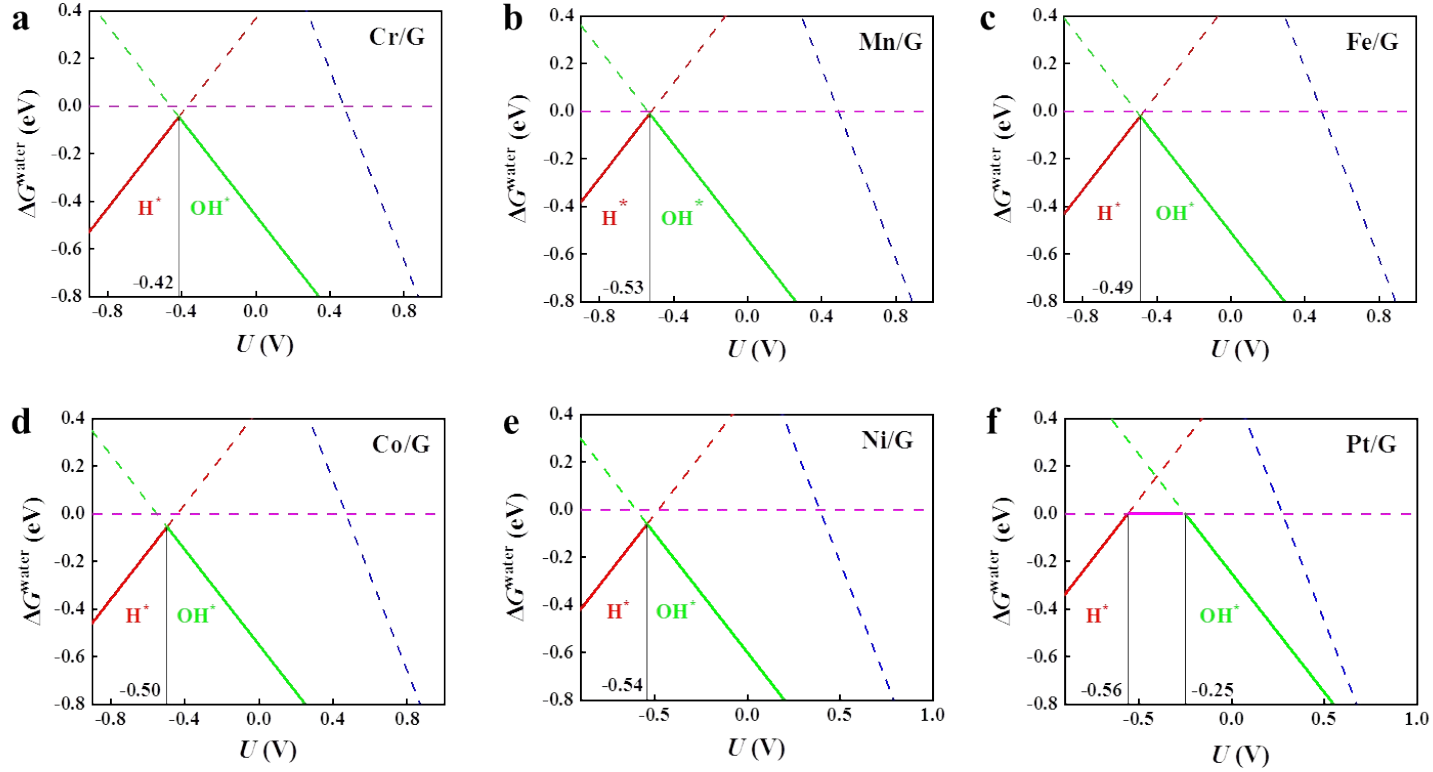

**Fig. S7** Phase diagram showing the free energy for different surface structures for water in contact with (a) Cr/G, (b) Mn/G, (c) Fe/G, (d) Co/G,

(e) Ni/G, and (f) Pt/G. The free energy for liquid water at 340 K is defined as  $\Delta G^{\text{water}}(U) = 0$  (pink line).  $\Delta G_{H^*}^{\text{water}}(U) = \Delta G_{H^*}^{\text{water}}(0) + eU$  (red

line),  $\Delta G_{OH^*}^{\text{water}}(U) = \Delta G_{OH^*}^{\text{water}}(0) - eU$  (green line), and  $\Delta G_{O^*}^{\text{water}}(U) = \Delta G_{O^*}^{\text{water}}(0) - 2eU$  (blue line).
